# Supplementary material
Source: PubMed Central journal article supplement (PMC4050577)
Supplement: 1400988111_pnas.201400988SI.pdf [file 1400988111_pnas.201400988SI.pdf]

# Supporting Information

Chiarlone et al. 10.1073/pnas.1400988111

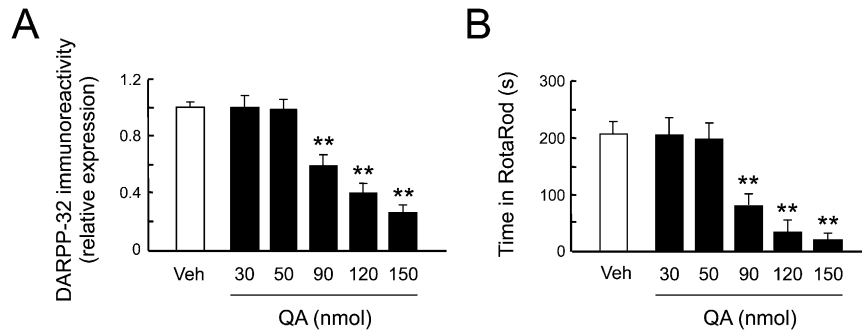

**Fig. S1.** Dose-dependent striatal damage induced by focal quinolinic acid (QA) injection. (*A* and *B*) WT (C57BL/6N) mice were injected intrastrially with vehicle (Veh) or the indicated doses of QA (in 1  $\mu$ L PBS solution, unilaterally;  $n = 6-8$  animals per group). RotaRod performance was evaluated during the following 3 d (*B*), and animals were killed the day after for determination of dopamine- and cAMP-regulated phosphoprotein of 32 kDa (DARPP-32) immunoreactivity in the dorsolateral striatum (*A*). Data expressed as relative values vs. vehicle-treated group (\*\* $P < 0.01$  vs. vehicle-treated group).

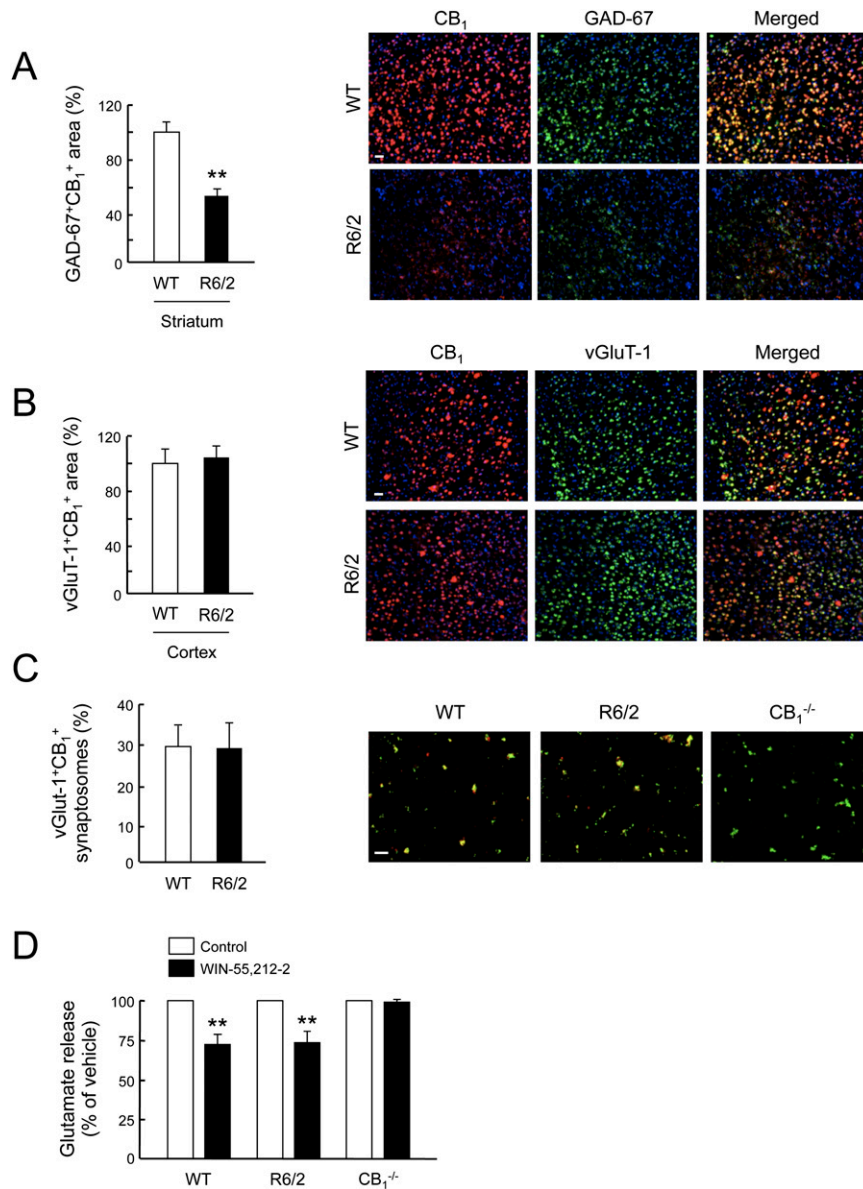

**Fig. S2.** CB<sub>1</sub> cannabinoid receptors are preserved on glutamatergic terminals in the striatum of symptomatic R6/2 mice. (A and B) Brain sections were obtained from 10-wk-old R6/2 mice and WT littermates. The coexpression of CB<sub>1</sub> and glutamic acid decarboxylase of 67 kDa (GAD-67) mRNAs in the dorsolateral striatum (A) or CB<sub>1</sub> and vesicular glutamate transporter-1 (vGluT-1) mRNAs in the deep motor cortex (B) was quantified by in situ hybridization. Data are given as area of coexpression relative to total cells recorded (DAPI staining;  $n = 4$  animals per group;  $**P < 0.01$  vs. corresponding WT group). (Scale bars, 50  $\mu\text{m}$ .) (C) Striatal synaptosomes were isolated from 10-wk-old R6/2 mice and WT littermates. CB<sub>1</sub>-expressing glutamatergic synaptosomes (Bassoon<sup>+</sup>vGluT-1<sup>+</sup>CB<sub>1</sub><sup>+</sup> structures) were counted and given as percentage of total synaptosomes (Bassoon<sup>+</sup> structures). Data correspond to three pools of R6/2 or WT mouse-derived synaptosomes, each of which was obtained by combining the striata of four R6/2 or WT mice. Representative images are shown (CB<sub>1</sub>, red; vGluT-1, green; Bassoon, blue, omitted for clarity). Striatal synaptosomes from CB<sub>1</sub><sup>-/-</sup> mice were used as control of CB<sub>1</sub> staining. (Scale bar, 20  $\mu\text{m}$ .) (D) CB<sub>1</sub> receptors preserved on glutamatergic terminals in the striatum of symptomatic R6/2 mice are functionally active. Effect of the cannabinoid receptor agonist WIN-55,212-2 (5  $\mu\text{M}$ ) on 30 mM KCl-evoked glutamate release in striatal synaptosomes from 10-wk-old R6/2 mice and WT littermates. Striatal synaptosomes from CB<sub>1</sub><sup>-/-</sup> mice were used as control of WIN-55,212-2 action ( $**P < 0.01$  vs. corresponding control group).

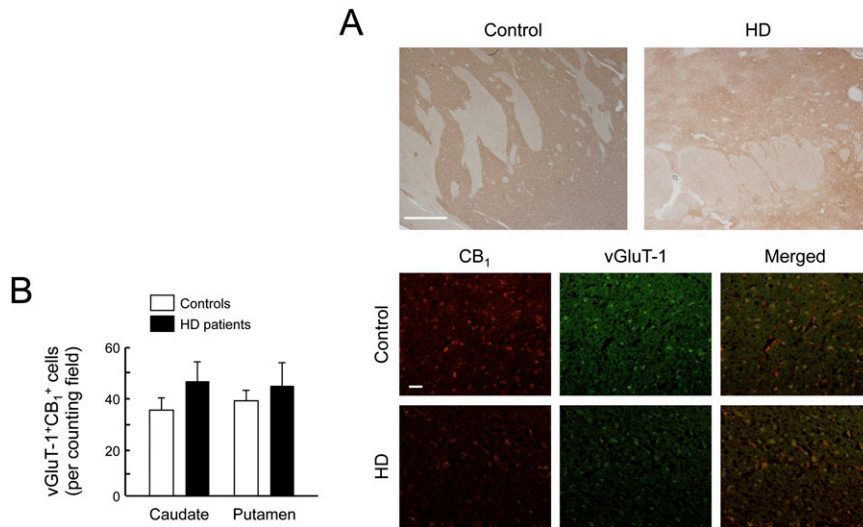

**Fig. 53.** CB<sub>1</sub> cannabinoid receptors are preserved on glutamatergic terminals in postmortem caudate-putamen specimens of patients with Huntington disease (HD). (A) Representative low-magnification immunohistochemistry images of CB<sub>1</sub> receptor staining in a control subject and a patient with HD. (Scale bar, 800 μm.) (B) Immunofluorescence analysis of CB<sub>1</sub>/vGluT-1 coexpression in control subjects (*n* = 5) and patients with HD (grades 3–4; *n* = 7). Representative images are shown (DAPI, blue, omitted for clarity). (Scale bar, 50 μm.)

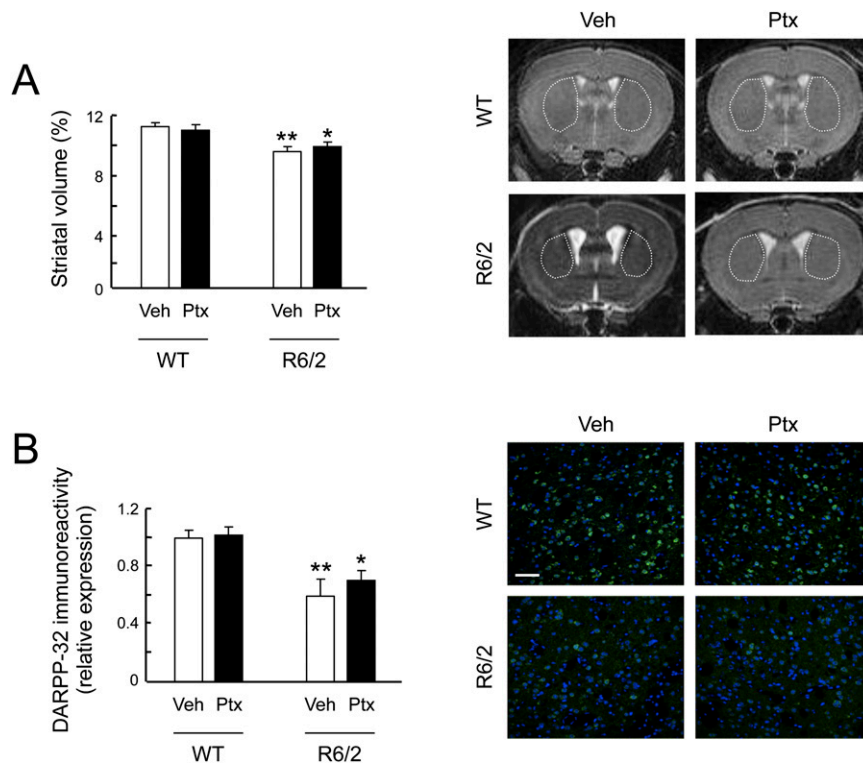

**Fig. 54.** Pharmacological blockade of GABA<sub>A</sub> receptors does not prevent HD-like striatal neurodegeneration in symptomatic R6/2 mice. (A and B) R6/2 mice and WT littermates were treated i.p. with vehicle (Veh) or picrotoxin (Ptx; 0.3 mg/kg body weight per day) from week 8 to week 12 of age. (A) Striatal volume (percentage of total brain volume). Representative MRI images are shown. The striata are outlined. (B) DARPP-32 immunoreactivity in the dorsolateral striatum (relative values from the vehicle-treated WT group). Representative images are shown (DARPP-32, green; Hoechst 33342, blue). (Scale bar, 50 μm.) Data in A and B correspond to 12-wk-old mice at the end of the treatments (*n* = 6–8 animals per group; \**P* < 0.05 and \*\**P* < 0.01 vs. corresponding WT group).

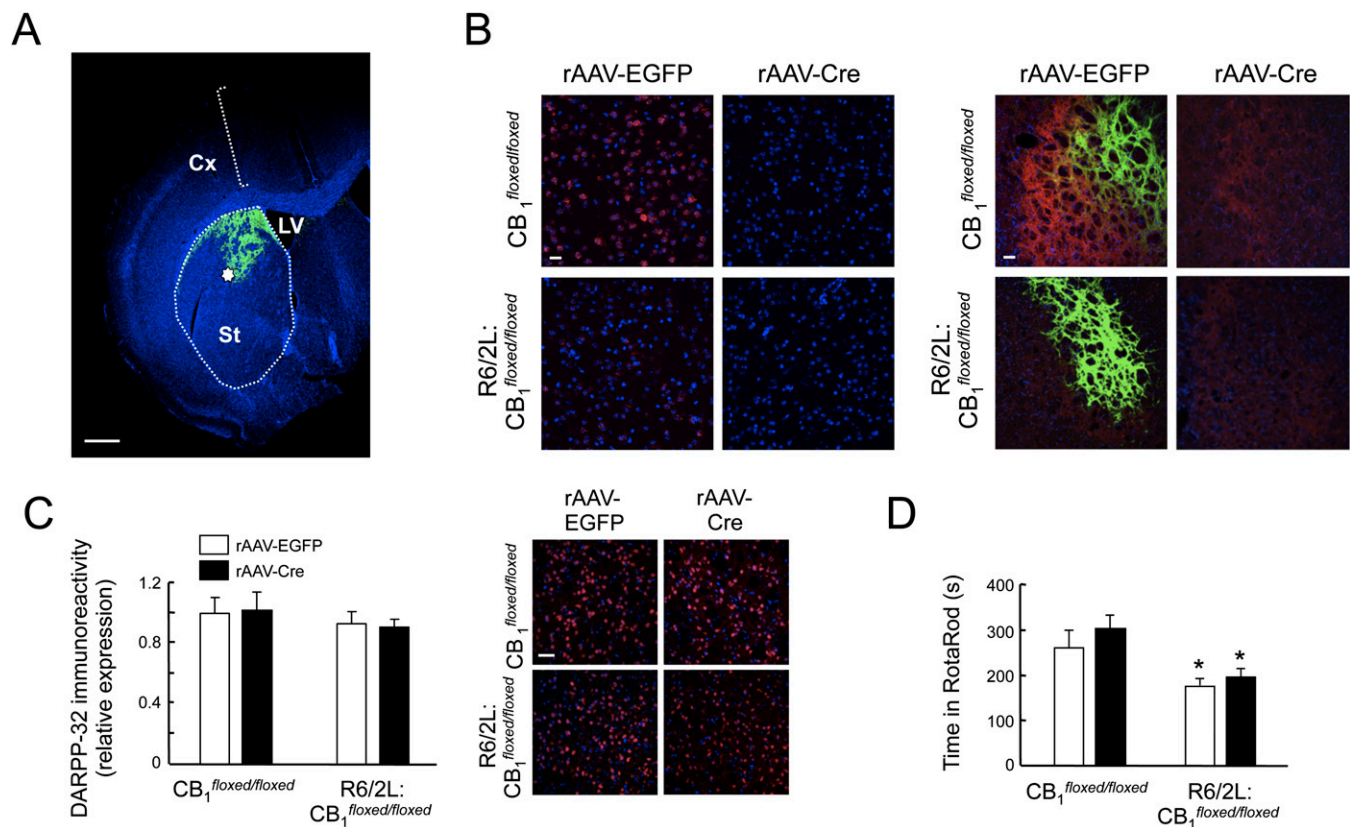

**Fig. S5.** Cre recombinase-driven deletion of CB<sub>1</sub> cannabinoid receptors in the dorsolateral striatum does not affect HD-like neurodegeneration. (A–D) Four-week-old R6/2L:CB<sub>1</sub><sup>flxed/flxed</sup> mice and CB<sub>1</sub><sup>flxed/flxed</sup> littermates were injected stereotactically into the dorsolateral striatum with a recombinant adenoassociated virus (rAAV) encoding Cre recombinase (or EGFP) under the control of the calcium/calmodulin-dependent protein kinase II- $\alpha$  (CaMKII $\alpha$ ) promoter ( $n = 8–12$  animals per group). At week 20 of age, RotaRod performance was evaluated, and animals were killed the day after for histological analyses. (A) Example of a brain hemisphere injected with rAAV–calcium/calmodulin-dependent protein kinase II- $\alpha$  promoter–EGFP (EGFP, green; DAPI, blue). Cx, cortex; LV, lateral ventricle; St, striatum (\*approximate site of injection). (Scale bar, 500  $\mu$ m.) (B) (Left) Representative images of CB<sub>1</sub> receptor mRNA in situ hybridization in the dorsolateral striatum (CB<sub>1</sub>, red; DAPI, blue). Note the Cre-mediated reduction of CB<sub>1</sub> mRNA expression. (Scale bar, 50  $\mu$ m.) (Right) Representative images of CB<sub>1</sub> receptor immunostaining in the globus pallidus (a major projecting area of medium-sized spiny neurons; CB<sub>1</sub>, red; EGFP, green; DAPI, blue). Note the Cre-mediated reduction of CB<sub>1</sub> protein expression. (Scale bar, 50  $\mu$ m.) (C) DARPP-32 immunoreactivity in the dorsolateral striatum (relative values vs. corresponding rAAV-EGFP-injected CB<sub>1</sub><sup>flxed/flxed</sup> group). Representative images of DARPP-32 staining are shown (DARPP-32, red; DAPI, blue). (Scale bar, 50  $\mu$ m.) (D) RotaRod performance (i.e., time to fall). (\* $P < 0.05$  vs. corresponding CB<sub>1</sub><sup>flxed/flxed</sup> group.)
